# Supplementary material for: Temporal patterns of populations in a warming world: a modelling framework
Source: Springer Nature journal article supplement (doi:10.1007/s00227-012-1996-4), 2012-07-16
Supplement: MOESM1 [file 227_2012_1996_MOESM1_ESM.pdf]

Appendix to

## **Temporal patterns of populations in a warming world: a modelling framework**

Sylvia Moenickes, Marieke Frassl, Jeanette Schliefl, Moritz Kupisch, Michael Mutz, Frank Suhling, Otto Richter

In the following, parameter values are listed for each application separately. In application 3 and 5, numerous parameters adopted dependencies on model-specific states. Hence, these relationships are also furnished and the meaning of introduced parameters can be found in the parameter list.

## App. 1: Growth and mortality at varying temperatures

| Parameter               | Value                                |
|-------------------------|--------------------------------------|
| $Q_{10 \text{ mort}}$   | $1.06 \text{ }^{\circ}\text{C}^{-1}$ |
| $Q_{10 \text{ growth}}$ | $1.5 \text{ }^{\circ}\text{C}^{-1}$  |
| $r_{\text{max}}$        | $0.024 \text{ d}^{-1}$               |
| $T_{\text{max}}$        | $40 \text{ }^{\circ}\text{C}$        |
| $T_{\text{min}}$        | $0 \text{ }^{\circ}\text{C}$         |
| $T_{\text{opt mort}}$   | $6.5 \text{ }^{\circ}\text{C}$       |
| $T_{\text{opt growth}}$ | $17 \text{ }^{\circ}\text{C}$        |
| $\mu$                   | $0.003 \text{ d}^{-1}$               |

## App. 2: Seasonal regulation mechanisms

| <b>Parameter</b>                    | <b>Value</b>               |
|-------------------------------------|----------------------------|
| $Q_{10\ 52^\circ\text{N}}$          | $2.1\ ^\circ\text{C}^{-1}$ |
| $Q_{10\ 60^\circ\text{N}}$          | $1.9\ ^\circ\text{C}^{-1}$ |
| $R_{\text{max}\ 52^\circ\text{N}}$  | $0.036\ \text{mm d}^{-1}$  |
| $R_{\text{max}\ 60^\circ\text{N}}$  | $0.028\ \text{mm d}^{-1}$  |
| $T_{\text{opt}\ 52^\circ\text{N}}$  | $28.7\ ^\circ\text{C}$     |
| $T_{\text{opt}\ 60^\circ\text{N}}$  | $26.5\ ^\circ\text{C}$     |
| $D_{\text{crit}\ 52^\circ\text{N}}$ | $12.5\ \text{h}$           |
| $D_{\text{crit}\ 60^\circ\text{N}}$ | $16.0\ \text{h}$           |
| $T_{\text{max}}$                    | $40\ ^\circ\text{C}$       |

### App. 3: Dispersal induced by extreme drought events

Growth equation:

$$\frac{ds}{dt} = \gamma (s_m - s) \Phi_T(T) = g(s, T) \quad (1)$$

Distribution of newborn:

$$\Pi(s) = \frac{1}{\sqrt{2\pi} s_d} e^{-\frac{(s-s_n)^2}{2s_d^2}} \quad (2)$$

Size-dependent mortality:

$$m_s(s) = \mu_s e^{-\left(\frac{s}{s_{c1}}\right)^\beta} + 1 - e^{-\left(\frac{s}{s_{c2}}\right)^\beta} \quad (3)$$

Temperature-dependent mortality:

$$m_T(T) = \alpha_1 e^{\alpha_2 T} \quad (4)$$

Water depth dependent mortality:

$$m_W(W) = \mu_W e^{\left(\frac{-W}{\tau_1}\right)^4} \quad (5)$$

| Parameter                | Value                                   | Meaning                                               |
|--------------------------|-----------------------------------------|-------------------------------------------------------|
| $Q_{10, \text{growth}}$  | 1.6 °C <sup>-1</sup>                    | shape parameter of temperature response, growth       |
| $T_{\text{max, growth}}$ | 26 °C                                   | maximum temperature, growth                           |
| $T_{\text{opt, growth}}$ | 18 °C                                   | optimum temperature, growth                           |
| $Q_{10, \text{birth}}$   | 2 °C <sup>-1</sup>                      | shape parameter of temperature response, reproduction |
| $T_{\text{max, birth}}$  | 26 °C                                   | maximum temperature, reproduction                     |
| $T_{\text{opt, birth}}$  | 18 °C                                   | optimum temperature, reproduction                     |
| $\mu_W$                  | 0.08                                    | water depth dependent mortality rate                  |
| $\mu_s$                  | 0.044 d <sup>-1</sup>                   | size dependent mortality rate                         |
| $b(s,n)$                 | 0.0045 d <sup>-1</sup>                  | total number of offspring                             |
| $s_{\text{min}}$         | 3 mm                                    | minimum size for reproduction                         |
| $s_{\text{max}}$         | 12 mm                                   | maximum size for reproduction                         |
| $b_{\text{max}}$         | 0.0016 mm <sup>-2</sup> d <sup>-1</sup> | maximum birth rate                                    |
| $\kappa$                 | 15                                      | shape parameter for water depth response              |
| $\tau_1$                 | 10 cm                                   | critical water depth (taking refuge)                  |
| $\tau_2$                 | 30 cm                                   | critical water depth (resumption)                     |
| $\tau$                   | 40 d                                    | time lag water depth response                         |
| $k_{\text{um}}$          | 0.03 d <sup>-1</sup>                    | dispersal rate between population in                  |

|            |                                      |                                                                 |
|------------|--------------------------------------|-----------------------------------------------------------------|
|            |                                      | upstream and main reach                                         |
| $k_{mu}$   | $0.01 \text{ d}^{-1}$                | dispersal rate between population in main and upstream reach    |
| $k_{mr}$   | $0.10 \text{ d}^{-1}$                | dispersal rate between population in main reach and refuge      |
| $k_{rm}$   | $0.10 \text{ d}^{-1}$                | dispersal rate between population in refuge and main reach      |
| $k_{md}$   | $0.03 \text{ d}^{-1}$                | dispersal rate between population in main and downstream reach  |
| $k_{dm}$   | $0.05 \text{ d}^{-1}$                | dispersal rate between population in downstream and main reach  |
| $\gamma$   | $0.0089 \text{ d}^{-1}$              | growth rate                                                     |
| $s_m$      | 12 mm                                | maximal body length                                             |
| $D$        | $0.0023 \text{ mm}^2 \text{ d}^{-1}$ | Diffusion coefficient                                           |
| $\alpha_1$ | $0.0041 \text{ d}^{-1}$              | empirical Parameter for the temperature dependence of mortality |
| $\alpha_2$ | $0.0698 \text{ }^\circ\text{C}^{-1}$ | empirical Parameter for the temperature dependence of mortality |
| $s_{c1}$   | 2 mm                                 | critical size juvenile mortality                                |
| $s_{c2}$   | 12 mm                                | critical size adult mortality                                   |
| $\kappa_s$ | 25                                   | shape parameter size-dependent mortality                        |
| $s_n$      | 0.7 mm                               | mean size at birth                                              |
| $s_d$      | 0.2 mm                               | standard deviation of size at birth                             |

## App. 4: Biotic interactions

| Parameter                           | Value                      |
|-------------------------------------|----------------------------|
| $Q_{10\ 52^\circ\text{N}}$          | $2.1\ ^\circ\text{C}^{-1}$ |
| $Q_{10\ 60^\circ\text{N}}$          | $1.9\ ^\circ\text{C}^{-1}$ |
| $R_{\text{max}\ 52^\circ\text{N}}$  | $0.036\ \text{mm d}^{-1}$  |
| $R_{\text{max}\ 60^\circ\text{N}}$  | $0.028\ \text{mm d}^{-1}$  |
| $T_{\text{opt}\ 52^\circ\text{N}}$  | $28.7\ ^\circ\text{C}$     |
| $T_{\text{opt}\ 60^\circ\text{N}}$  | $26.5\ ^\circ\text{C}$     |
| $D_{\text{crit}\ 52^\circ\text{N}}$ | $12.5\ \text{h}$           |
| $D_{\text{crit}\ 60^\circ\text{N}}$ | $16.0\ \text{h}$           |
| $T_{\text{max}}$                    | $40\ ^\circ\text{C}$       |
| $a(s) = \text{const} = a$           | 1                          |
| $K$                                 | 45                         |

## App. 5: Coupled consumer-resource dynamics

The consumer-resource dynamics is described by a coupled system of three balance equations:

$$\frac{\partial n_G}{\partial t} = -\frac{\partial g u_G}{\partial s} - m n_G + B \Pi_s(s) \quad (1)$$

$$\frac{\partial n_L}{\partial t} = -\frac{\partial c n_L}{\partial q} - (f_{\text{Shr}} + a) n_L + J \Pi_q(q) \quad (2)$$

$$\frac{dA}{dt} = -\eta B - f_{\text{Rea}} A + \epsilon \int f_{\text{Shr}} n_L dq \quad (3)$$

Growth of G. pulex population:

$$g = \min(0, \gamma (s_{\text{max}} \rho_g - s) \phi_g(T)) \quad (4)$$

Total mortality:

$$m = 1 - (1 - \mu) (1 - m_T(T)) (1 - m_s(s)) (1 - m_L(t)) \quad (5)$$

Temperature-dependent mortality:

$$m_T(T) = \frac{\mu}{1 - \mu} (e^{\alpha T} - 1) \quad (6)$$

Size-dependent mortality:

$$m_s(s) = \mu_j e^{-\left(\frac{s}{s_{c1}}\right)^{\beta_1}} + 1 - e^{-\left(\frac{s}{s_{c2}}\right)^{\beta_2}} \quad (7)$$

Food-dependent mortality:

$$m_L(t) = 1 - e^{-\left(\frac{M(t)}{\tau_s}\right)^{\beta_L}} \quad (8)$$

Reproduction:

$$B = \phi_b(T) \rho_b \int_{s_b}^{s_{\max}} b_{\max} s^2 u_G(t, x) dx \quad (9)$$

Size-specific reproduction rate:

$$b_{\max} = \frac{1}{2} \frac{b}{365} r_{\max} \quad (10)$$

Conditioning of leaf litter:

$$c = c_{\max} \phi_c(T) (1 - H(q - 0.9)) \quad (11)$$

with the Heaviside function  $H$  switching off further conditioning beyond a quality  $q = 0.9$ . Alternative decomposition is modelled as

Net leaf fall:

$$J = F(t)(1 - l_c) \quad (12)$$

Alternative decomposition:

$$a = a_{\max} \phi_c(T) \quad (13)$$



Loss of leaf litter through shredding:

$$f_{\text{Shr}} = \frac{e_c \phi_g(T) P_{\text{DW}}}{1 + \int_0^1 \frac{e_c}{I_{\text{max}}(q)} u_L(t, q) dq} \quad (14)$$

Maximum feeding rate:

$$I_{\text{max}}(q) = (I_{\text{ceil}} - I_{\text{base}}) q + I_{\text{base}} \quad (15)$$

Reallocation of energy:

$$f_{\text{Rea}} = \begin{cases} \frac{e_c \phi_g(T) P_{\text{DW}}}{1 + \frac{e_c}{I_{\text{ceil}}} A} & \text{if } L(t) < L_c \\ 0 & \text{else} \end{cases} \quad (16)$$

Energy response of reproduction:

$$\rho_b = \frac{A}{A + \eta_E \int_{s_b}^{s_{\text{max}}} b_{\text{max}} s^2 u_G(t, x) ds} \quad (17)$$

Energy response of growth:

$$\rho_g = \begin{cases} \frac{Q(t)+A(t)}{Q(t)+A(t)+\frac{I_{\text{ceil}}}{e_c}} & \text{if } L(t) < L_c \\ \frac{Q(t)}{Q(t)+\frac{I_{\text{ceil}}}{e_c}} & \text{else} \end{cases} \quad (18)$$

Total leaf litter content:

$$L(t) = \int_0^1 n_L(t, q) dq \quad (19)$$

Total quality weighted leaf litter content:

$$Q(t) = \int_0^1 q n_L(t, q) dq \quad (20)$$

Total abundance of *G. pulex*:

$$N(t) = \int_0^{s_{\max}} n_G(t, s) ds \quad (21)$$

Total shredding mass of *G. pulex*:

$$P_{\text{DW}}(t) = \int_{s_f}^{s_{\max}} w_D(s) n_G(t, s) ds \quad (22)$$

Size-dependent dry weight of *G. pulex*:

$$w_D(s) = 0.0024 s^3 \quad (23)$$

$F(t)$  is leaf litter fall.  $\Pi_s(s)$  and  $\Pi_q(q)$  introduce the newborns and recently fallen leaves with a normal distribution.

The starvation mortality depends on the state of a timer,  $M(t)$ , which counts consecutive days without food (i.e. days with  $L(t) < L_c$ ).

| Symbol            | Unit                                                   | Meaning                                      |
|-------------------|--------------------------------------------------------|----------------------------------------------|
| $a_{\max}$        | 0.1 d <sup>-1</sup>                                    | Microbial decay rate                         |
| $b$               | 10 y <sup>-1</sup>                                     | Number of broods per year                    |
| $e_c$             | 0.0001 m <sup>2</sup> d <sup>-1</sup> mg <sup>-1</sup> | Encounter rate                               |
| $g_{\max}$        | 0.19 d <sup>-1</sup>                                   | Maximum rate of leaf conditioning            |
| $I_{\text{base}}$ | 0.0001 g mg <sup>-1</sup> d <sup>-1</sup>              | Feeding rate on unconditioned leaves         |
| $I_{\text{ceil}}$ | 0.0004 g mg <sup>-1</sup> d <sup>-1</sup>              | Feeding rate on maximally conditioned leaves |
| $L_c$             | 0.1 g m <sup>-2</sup>                                  | Critical total leaf litter for starvation    |
| $l_c$             | 0.1                                                    | Fraction of leached leaf fall                |
| $q_{10b}$         | 4.4 °C <sup>-1</sup>                                   | Temperature coefficient reproduction         |

|                   |                                      |                                                 |
|-------------------|--------------------------------------|-------------------------------------------------|
| $q_{10f}$         | $1,85 \text{ } ^\circ\text{C}^{-1}$  | Temperature coefficient feeding and growth      |
| $q_{10L}$         | $2 \text{ } ^\circ\text{C}^{-1}$     | Temperature coefficient decay                   |
| $r_{\max}$        | $0.1985 \text{ mm}^{-2}$             | Maximum reproduction rate                       |
| $s_b$             | 6 mm                                 | Minimum size for reproduction                   |
| $s_{c1}$          | 3 mm                                 | Critical size of the juvenile mortality         |
| $s_{c2}$          | 18 mm                                | Critical size of the senile mortality           |
| $s_f$             | 3 mm                                 | Minimum size for litter feeding                 |
| $s_{\max}$        | 18.89 mm                             | Maximum size                                    |
| $T_{\max b}$      | 29 °C                                | Maximum temperature reproduction                |
| $T_{\max f}$      | 40 °C                                | Maximum temperature feeding and growth          |
| $T_{\max L}$      | 40 °C                                | Maximum temperature decay                       |
| $T_{\text{opt}b}$ | 14.4 °C                              | Optimal temperature reproduction                |
| $T_{\text{opt}f}$ | 17.44 °C                             | Optimal temperature feeding and growth          |
| $T_{\text{opt}L}$ | 30 °C                                | Optimal temperature decay                       |
| $\alpha$          | $0.155 \text{ } ^\circ\text{C}^{-1}$ | Shape parameter mortality                       |
| $\beta_1$         | 25                                   | Shape parameter mortality                       |
| $\beta_2$         | 10                                   | Shape parameter mortality                       |
| $\beta_L$         | 8                                    | Shape parameter mortality                       |
| $\gamma$          | $0.0062 \text{ d}^{-1}$              | Bertalanffy growth rate                         |
| $\varepsilon$     | 0.7                                  | shredding efficiency                            |
| $\eta$            | 0.006 g                              | Energy loss per newborn                         |
| $\eta_E$          | 0.006 g d                            | Energy loss per newborn; rate response function |
| $\mu$             | $0.0018 \text{ d}^{-1}$              | Basic mortality                                 |
| $\mu_j$           | $0.002 \text{ d}^{-1}$               | Juvenile mortality                              |
| $\tau_s$          | 50 d                                 | Average survival time under starvation          |
